# Supplementary material
Source: publisher figshare collection journal article supplement (https://asha.figshare.com/articles/dataset/_/14782092)
Supplement: Supplementary file [file 1]

**Supplemental Material S1.** Effect of word length on variability.

| <i>Predictors</i>             | <b>Variability (CoV)</b> |                  |               |                  |
|-------------------------------|--------------------------|------------------|---------------|------------------|
|                               | <i>std. Beta</i>         | <i>Estimates</i> | <i>CI</i>     | <i>p</i>         |
| (Intercept)                   |                          | 0.24             | 0.22 – 0.26   | <b>&lt;0.001</b> |
| Group PWS:PWTF                | -0.14                    | -0.07            | -0.11 – -0.03 | <b>&lt;0.001</b> |
| Word 1:2                      | -0.10                    | -0.05            | -0.08 – -0.02 | <b>0.001</b>     |
| Word 1:3                      | 0.22                     | -0.05            | -0.09 – -0.02 | <b>0.002</b>     |
| Word 2:3                      | 0.05                     | 0.03             | -0.01 – 0.06  | 0.102            |
| Articulator Lip:Velum         | 0.09                     | -0.10            | -0.13 – -0.08 | <b>&lt;0.001</b> |
| Articulator Lip:Tongue        | -0.33                    | -0.10            | -0.12 – -0.08 | <b>&lt;0.001</b> |
| Articulator Velum:Tongue      | -0.09                    | 0.01             | -0.02 – 0.03  | 0.611            |
| Group PWS:PWTF * word 1:2     | 0.08                     | 0.02             | -0.03 – 0.06  | 0.490            |
| Group PWS:PWTF * word 1:3     | -0.64                    | 0.01             | -0.04 – 0.06  | 0.778            |
| Group PWS:PWTF * word 2:3     | 0.23                     | -0.01            | -0.06 – 0.04  | 0.688            |
| Word1:2 * Lip:Velum           | 0.03                     | 0.02             | -0.01 – 0.05  | 0.181            |
| Word1:3 * Lip:Velum           | 0.36                     | 0.05             | 0.02 – 0.08   | <b>0.003</b>     |
| Word2:3 * Lip:Velum           | -0.08                    | 0.03             | -0.01 – 0.06  | 0.098            |
| Word1:2 * Lip:Tongue          | -0.09                    | 0.05             | 0.02 – 0.09   | <b>0.001</b>     |
| Word1:3 * Lip:Tongue          | 0.29                     | 0.09             | 0.06 – 0.12   | <b>&lt;0.001</b> |
| Word2:3 * Lip:Tongue          | 0.11                     | 0.03             | 0.00 – 0.07   | <b>0.040</b>     |
| Word1:2 * Velum:Tongue        | 0.06                     | 0.03             | -0.00 – 0.06  | 0.051            |
| Word1:3 * Velum:Tongue        | 0.13                     | 0.04             | 0.01 – 0.07   | <b>0.021</b>     |
| Word2:3 * Velum:Tongue        | 0.08                     | 0.01             | -0.03 – 0.04  | 0.691            |
| Group PWS:PWTF * Lip:Velum    | -0.33                    | 0.05             | 0.02 – 0.09   | <b>0.005</b>     |
| Group PWS:PWTF * Lip:Tongue   | -0.44                    | 0.06             | 0.03 – 0.10   | <b>&lt;0.001</b> |
| Group PWS:PWTF * Velum:Tongue | -0.12                    | 0.01             | -0.02 – 0.05  | 0.489            |

|                                                                                                                  |       |       |               |              |
|------------------------------------------------------------------------------------------------------------------|-------|-------|---------------|--------------|
| Group PWS:PWTF * Word 1:2 * Lip:Velum                                                                            | -0.61 | -0.03 | -0.08 – 0.02  | 0.189        |
| Group PWS:PWTF * Word 1:3 * Lip:Velum                                                                            | 0.36  | -0.03 | -0.08 – 0.02  | 0.179        |
| Group PWS:PWTF * Word 2:3 * Lip:Velum                                                                            | 0.00  | 0.00  | -0.05 – 0.05  | 0.968        |
| Group PWS:PWTF * Word 1:2 * Lip:Tongue                                                                           | -0.09 | -0.04 | -0.09 – 0.01  | 0.168        |
| Group PWS:PWTF * word 1:3 * Lip:Tongue                                                                           | 0.29  | -0.05 | -0.10 – -0.00 | <b>0.045</b> |
| Group PWS:PWTF * Word 2:3 * Lip:Tongue                                                                           | 0.10  | -0.02 | -0.07 – 0.03  | 0.527        |
| Group PWS:PWTF * Word 1:2 * Velum:Tongue                                                                         | 0.64  | -0.00 | -0.05 – 0.05  | 0.949        |
| Group PWS:PWTF * Word 1:3 * Velum:Tongue                                                                         | 0.09  | -0.02 | -0.07 – 0.03  | 0.509        |
| Group PWS:PWTF * Word 2:3 * Velum:Tongue                                                                         | -0.04 | -0.02 | -0.07 – 0.04  | 0.553        |
| <b>Random Effects</b>                                                                                            |       |       |               |              |
| Marginal R <sup>2</sup>                                                                                          |       |       |               | 0.261        |
| Conditional R <sup>2</sup>                                                                                       |       |       |               | 0.698        |
| N <sub>participant</sub>                                                                                         |       |       |               | 48           |
| Observations                                                                                                     |       |       |               | 411          |
| R formula = variability ~ group * word * articulator + (1 + word   p_code), REML = TRUE, contrasts = contra.sum) |       |       |               |              |
