# Supplementary material
Source: publisher figshare collection journal article supplement (https://asha.figshare.com/articles/dataset/_/14782092)
Supplement: Supplementary file [file 1]

**Supplemental Material S3. Effect of word length on duration**

| <i>Predictors</i>                                                                           | <i>Std. Beta</i> | <b>Mean Duration (frames)</b> |               |                  |
|---------------------------------------------------------------------------------------------|------------------|-------------------------------|---------------|------------------|
|                                                                                             |                  | <i>Estimates</i>              | <i>CI</i>     | <i>p</i>         |
| (Intercept)                                                                                 |                  | 6.87                          | 5.46 – 8.29   | <b>&lt;0.001</b> |
| Group PWS:PWTF                                                                              | 0.03             | 0.82                          | -1.37 – 3.00  | 0.465            |
| Word 1:2                                                                                    | 0.63             | 15.75                         | 14.83 – 16.67 | <b>&lt;0.001</b> |
| Word 1:3                                                                                    | 1.12             | 28.57                         | 27.62 – 29.52 | <b>&lt;0.001</b> |
| Word 2:3                                                                                    | 0.5              | 12.82                         | 11.87 – 13.76 | <b>&lt;0.001</b> |
| Group PWS:PWTF * Word 1:2                                                                   | -0.05            | -1.74                         | -3.16 – -0.31 | <b>0.017</b>     |
| Group PWS:PWTF * Word 1:3                                                                   | -0.12            | -4.10                         | -5.54 – -2.66 | <b>&lt;0.001</b> |
| Group PWS:PWTF * Word 2:3                                                                   | -0.07            | -2.36                         | -3.81 – -0.92 | <b>0.001</b>     |
| <b>Random Effects</b>                                                                       |                  |                               |               |                  |
| Marginal R <sup>2</sup>                                                                     |                  | 0.857                         |               |                  |
| Conditional R <sup>2</sup>                                                                  |                  | 0.938                         |               |                  |
| N <sub>participant</sub>                                                                    |                  | 48                            |               |                  |
| Observations                                                                                |                  | 411                           |               |                  |
| R formula = mean_duration ~ group * word + (1   p_code), REML = TRUE, contrasts = contr.sum |                  |                               |               |                  |
