# Supplementary material
Source: publisher figshare collection journal article supplement (https://asha.figshare.com/articles/dataset/_/14782092)
Supplement: Supplementary file [file 1]

**Supplemental Material S2.** Effect of phonological complexity on variability.

| <i>Predictors</i>                                                                                              | <i>Std. Beta</i> | <i>Estimates</i> | <b>Variability (CoV)</b> |                  |
|----------------------------------------------------------------------------------------------------------------|------------------|------------------|--------------------------|------------------|
|                                                                                                                |                  |                  | <i>CI</i>                | <i>p</i>         |
| (Intercept)                                                                                                    |                  | 0.18             | 0.15 – 0.20              | <b>&lt;0.001</b> |
| Group PWS:PWTF                                                                                                 | -0.26            | -0.04            | -0.08 – 0.00             | 0.077            |
| Word 4c:4s                                                                                                     | -0.04            | -0.00            | -0.03 – 0.03             | 0.932            |
| Articulator Lip:Velum.                                                                                         | -0.11            | -0.05            | -0.08 – -0.03            | <b>&lt;0.001</b> |
| Articulator Lip:Tongue                                                                                         | -0.15            | -0.02            | -0.05 – 0.00             | 0.086            |
| Articulator Velum:Tongue                                                                                       | 0.11             | 0.03             | 0.01 – 0.06              | <b>0.008</b>     |
| Group PWS:PWTF * Word 4c:4s                                                                                    | -0.38            | 0.02             | -0.02 – 0.07             | 0.382            |
| Word 4c:4s * Lip:Velum                                                                                         | -0.01            | -0.02            | -0.05 – 0.02             | 0.275            |
| Word 4c:4s * Lip:Tongue                                                                                        | 0.00             | -0.00            | -0.04 – 0.03             | 0.894            |
| Word 4c:4s * Velum:Tongue                                                                                      | 0.00             | 0.02             | -0.02 – 0.05             | 0.337            |
| Group PWS:PWTF * Lip:Velum                                                                                     | -0.02            | 0.00             | -0.04 – 0.04             | 0.981            |
| Group PWS:PWTF * Lip:Tongue                                                                                    | -0.01            | -0.01            | -0.05 – 0.03             | 0.714            |
| Group PWS:PWTF * word 4c:4s * Lip:Velum                                                                        | -0.02            | -0.01            | -0.06 – 0.04             | 0.706            |
| Group PWS:PWTF * word 4c:4s * Lip:Tongue                                                                       | 0.12             | -0.01            | -0.06 – 0.05             | 0.822            |
| Group PWS:PWTF * Word 4c:4s * Velum:Tongue                                                                     | 0.04             | 0.00             | -0.05 – 0.06             | 0.878            |
| <b>Random Effects</b>                                                                                          |                  |                  |                          |                  |
| Marginal R <sup>2</sup>                                                                                        |                  | 0.210            |                          |                  |
| Conditional R <sup>2</sup>                                                                                     |                  | 0.587            |                          |                  |
| N <sub>participant</sub>                                                                                       |                  | 47               |                          |                  |
| Observations                                                                                                   |                  | 273              |                          |                  |
| R formula = variability ~ group * word * articulator + (1 + word   p_code), REML= TRUE, contrasts = contra.sum |                  |                  |                          |                  |
