# Supplementary material
Source: publisher figshare collection journal article supplement (https://asha.figshare.com/articles/dataset/_/14782092)
Supplement: Supplementary file [file 1]

**Supplemental Material S4.** Effect of phonological complexity on duration

| <i>Predictors</i>           | <i>Std. Beta</i> | <b>Mean Duration (frames)</b> |                 |                  |
|-----------------------------|------------------|-------------------------------|-----------------|------------------|
|                             |                  | <i>Estimates</i>              | <i>CI</i>       | <i>p</i>         |
| (Intercept)                 |                  | 49.33                         | 46.55 – 52.10   | <b>&lt;0.001</b> |
| group PWS:PWTF              | -0.26            | -6.21                         | -10.47 – -1.96  | <b>0.004</b>     |
| Word 4c:4s                  | -0.77            | -17.82                        | -18.69 – -16.95 | <b>&lt;0.001</b> |
| Group PWS:PWTF * word 4c:4s | 0.09             | 2.51                          | 1.15 – 3.87     | <b>&lt;0.001</b> |

  

|                            |         |
|----------------------------|---------|
| <b>Random Effects</b>      |         |
| Marginal R <sup>2</sup>    | 0.568 / |
| Conditional R <sup>2</sup> | 0.944   |
| N <sub>p_code</sub>        | 47      |
| Observations               | 273     |

---

R formula = mean\_duration ~ group \* word + (1 | p\_code), REML = TRUE, contrasts = contr.sum
